# Supplementary material for: Heterostructured MoP/CoMoP2 embedded in an N, P-doped carbon matrix as a highly efficient cooperative catalyst for pH-universal overall water splitting
Source: Royal Society of Chemistry journal article supplement (doi:10.1039/d3ta05328h), 2023-11-27
Supplement: d3ta05328h1.pdf [file d3ta05328h1.pdf]

# Heterostructured MoP/CoMoP<sub>2</sub> embedded in N, P-doped carbon matrix as a highly efficient cooperative catalyst for pH-universal overall water splitting

Luyao Zheng<sup>a, b</sup>, Cong Liu<sup>c</sup>, Wenbiao Zhang<sup>a, d</sup>, Boxu Gao<sup>a</sup>, Tianlan Yan<sup>a</sup>, Yahong Zhang<sup>a</sup>, Xiaoming Cao<sup>c</sup>, Qingsheng Gao<sup>c\*</sup> and Yi Tang<sup>a\*</sup>

*a. Department of Chemistry, Shanghai Key Laboratory of Molecular Catalysis and Innovative Materials, Laboratory of Advanced Materials and Collaborative Innovation Center of Chemistry for Energy Materials, Fudan University, Shanghai 200433, China. E-mail: [yitang@fudan.edu.cn](mailto:yitang@fudan.edu.cn)*

*b. School of Materials Science and Engineering, Changzhou Key Laboratory of Intelligent Manufacturing and Advanced Technology for Power Battery, Changzhou University, Changzhou 213164, China.*

*c. Key Laboratory for Advanced Materials, Center for Computational Chemistry and Research Institute of Industrial Catalysis, School of Chemistry and Molecular Engineering, East China University of Science & Technology, Shanghai 200237, China.*

*d. College of Chemistry and Materials Science, And Guangdong Provincial Key Laboratory of Functional Supramolecular Coordination Materials and Applications, Jinan University, Guangzhou, 510632, China. E-mail: [tqsgao@jnu.edu.cn](mailto:tqsgao@jnu.edu.cn)*

## Electrochemical measurements

Hydrogen evolution reaction (HER) and oxygen evolution reactions (OER) were conducted at room temperature using a typical three-electrode configuration equipped with a CHI760E potentiostat (CH Instruments, China). All the potentials were converted to this reversible hydrogen electrode (RHE) according to the equation:

$$E(RHE) = E(SCE) + 0.2422 + 0.059pH, \text{ in acidic or neutral media} \quad (1)$$

$$E(RHE) = E\left(\frac{Hg}{HgO}\right) + 0.098 + 0.059pH, \text{ in alkaline media} \quad (2)$$

Overall water splitting (OWS) was conducted using a typical two-electrode system. The working electrode modified by catalysts was prepared as following procedure. 20 mg of the catalysts were ultrasonicated with 1 mL of water-ethanol-nafion solution with  $V_{\text{water}}: V_{\text{ethanol}}: V_{\text{nafion solution}}=7:2:1$  for 30 min to obtain a homogeneous ink. Then, 4  $\mu\text{L}$  of the as-prepared ink was coated onto the glassy carbon electrode and dried in air. Linear sweep voltammetry (LSV) was performed in 0.5 M  $\text{H}_2\text{SO}_4$ , 1 M KOH or 1.0 M phosphate buffered saline (PBS) at a scan rate of 5  $\text{mV s}^{-1}$  with IR-corrections conducted for every electrode. A saturated calomel electrode (in 0.5 M  $\text{H}_2\text{SO}_4$  or 1.0 M PBS) or Hg/HgO (in 1 M KOH) electrode was acting as the reference electrode and graphite rod as counter electrode. Cyclic voltammograms (CV) test was performed from 0 to 0.3 V (versus RHE) with different scan rates (25, 50, 75, 100, 150, 200, 250 and 300  $\text{mV s}^{-1}$ ). Electrochemical impedance spectroscopy (EIS) was conducted at 200 mV (versus RHE) from  $10^{-2}$  to  $10^6$  Hz.

## EXAFS fitting

Data reduction, data analysis, and EXAFS fitting were performed and analyzed with the Athena and Artemis programs of the Demeter data analysis packages (reference 1) that utilizes the FEFF6 program (reference 3) to fit the EXAFS data. The energy calibration of the sample was conducted through standard Co foil and Mo foil, which as a reference was simultaneously measured. A linear function was subtracted from the pre-edge region, then the edge jump was normalized using Athena software. The  $\chi(k)$  data were isolated by subtracting a smooth, third-order polynomial approximating the absorption background of an isolated atom. The  $k^3$ -weighted  $\chi(k)$  data were Fourier

transformed after applying a Hanning window function ( $\Delta k = 1.0$ ). For EXAFS modeling, the global amplitude EXAFS ( $CN$ ,  $R$ ,  $\sigma^2$  and  $\Delta E_0$ ) were obtained by nonlinear fitting, with least-squares refinement, of the EXAFS equation to the Fourier-transformed data in  $R$ -space, using Artemis software, EXAFS of the Co foil and Mo foil are fitted and the obtained amplitude reduction factor  $S_0^2$  value (0.791 and 0.946) was set in the EXAFS analysis to determine the coordination numbers ( $CNs$ ) in the Co/Mo-O scattering path in sample.

### The TOF calculation

we assume that all Mo and Co atoms of electrocatalyst are active sites and the Faraday efficiency is 100%.

$$\text{TOF} = \frac{\text{the number of theoretic Hydrogen molecules (n}_{\text{H}_2})}{\text{the total number of Mo and Co atoms on the electrode (n}_{\text{MoCo}})}$$

$$n_{\text{MoCo}} = \left( \frac{m_{\text{loading}} \times W_{\text{Mo}}}{M_{\text{Mo}}} + \frac{m_{\text{loading}} \times W_{\text{Co}}}{M_{\text{Co}}} \right) \times N_A$$

$$n_{\text{H}_2} = \frac{j_\eta \times S \times N_A}{n \times F}$$

Where  $m_{\text{loading}}$  is the loading mass of the catalysts on the surface of glass carbon;  $W_{\text{Mo}}$  and  $W_{\text{Co}}$  are the content of Mo and Co element collected by ICP;  $M_{\text{Mo}}$  and  $M_{\text{Co}}$  are relative atomic masses of Co and Mo;  $N_A$  is the Avogadro's number ( $6.02 \times 10^{23} \text{ mol}^{-1}$ );  $j_\eta$  is the current density at an overpotential of  $\eta$ ;  $S$  is the surface area of glassy carbon electrode;  $n$  is the number of electrons transferred per molecule (2 for HER);  $F$  is the Faraday constant ( $96485 \text{ C mol}^{-1}$ ).

### Density Functional Theory Calculations

All calculations were performed with the Perdew–Burke–Ernzerhof (PBE) functional using the VASP code. Standard projector-augmented-wave (PAW) method was used to represent the core-valence electron interaction. PBE-D3 (BJ) is also included to describe van der Waals interaction. The valence electronic states were expanded in plane wave basis sets with energy cutoff of 450 eV.

The  $\text{CoMoP}_2$  (104) surface is modeled by a 5-layer  $p(1 \times 3)$  unit cell of 15.8 Å, 9.8 Å with a 20.0 Å vacuum between the slabs in the  $z$  direction. During the geometry

optimization, the bottom two layers are fixed while the atomic positions of the adsorbates and the top three layers are relaxed. The Brillouin zone is sampled with a  $2 \times 3 \times 1$  Monkhorst–Pack k-point mesh.

The MoP (101) surface is modeled by a 5-layer  $p(3 \times 3)$  unit cell of 13.5 Å, 9.6 Å with a 20.0 Å vacuum between the slabs in the z direction. During the geometry optimization, the bottom two layers are fixed while the atomic positions of the adsorbates and the top three layers are relaxed. The Brillouin zone is sampled with a  $2 \times 3 \times 1$  Monkhorst–Pack k-point mesh.

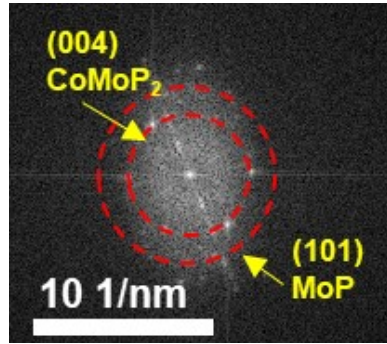

**Fig. S1** FFT patterns of MoP/CoMoP<sub>2</sub>@NPC.

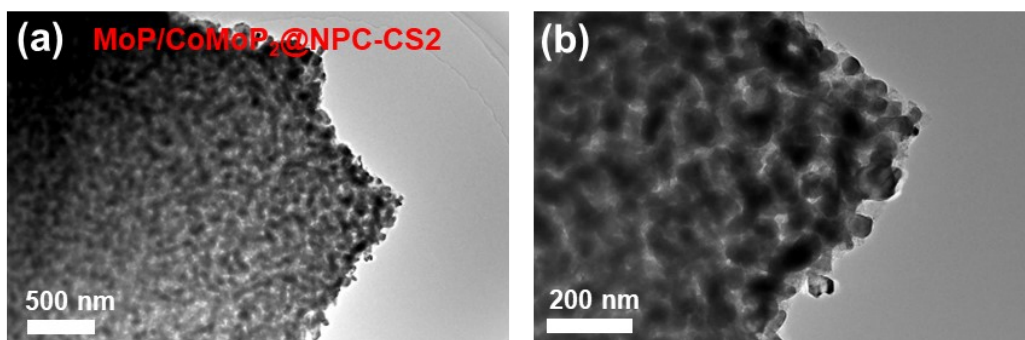

**Fig. S2** TEM (a) and HRTEM (b) images of MoP/CoMoP<sub>2</sub>@NPC-CS2.

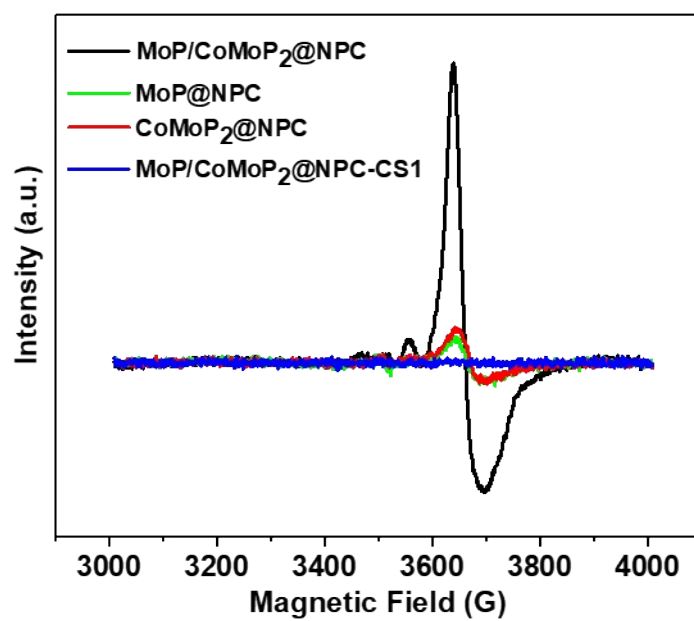

**Fig. S3** ESR spectra of MoP@NPC, MoP/CoMoP<sub>2</sub>@NPC, CoMoP<sub>2</sub>@NPC and MoP/CoMoP<sub>2</sub>@NPC-CS1.

**Table S1** Binding energies of Mo3d for MoP@NPC, MoP/CoMoP<sub>2</sub>@NPC and CoMoP<sub>2</sub>@NPC.

|                             | Mo-P   | Mo-P   | MoO <sub>2</sub> | MoO <sub>2</sub> | MoO <sub>3</sub> | MoO <sub>3</sub> |
|-----------------------------|--------|--------|------------------|------------------|------------------|------------------|
|                             | 3d 3/2 | 3d 5/2 | 3d 3/2           | 3d 5/2           | 3d 3/2           | 3d 5/2           |
| MoP@NPC                     | 230.7  | 227.6  | 232.6            | 229.1            | 235.7            | 232.6            |
| MoP/CoMoP <sub>2</sub> @NPC | 230.9  | 227.9  | 231.5            | 228.8            | 235.8            | 232.8            |
| CoMoP <sub>2</sub> @NPC     | 231.2  | 228.2  | 231.8            | 229.1            | 235.9            | 233.9            |



**Table S2** Binding energies of P2p for MoP@NPC, MoP/CoMoP<sub>2</sub>@NPC and CoMoP<sub>2</sub>@NPC.

|                             | P-O   | P 2p <sub>3/2</sub> | P 2p <sub>1/2</sub> |
|-----------------------------|-------|---------------------|---------------------|
| MoP@NPC                     | 134.0 | 129.4               | 130.3               |
| MoP/CoMoP <sub>2</sub> @NPC | 134.2 | 129.5               | 130.4               |
| CoMoP <sub>2</sub> @NPC     | 134.6 | 129.2               | 130.2               |

**Table S3** Binding energies of Co2p for CoMoP<sub>2</sub>@NPC and MoP/CoMoP<sub>2</sub>@NPC.

| Co2p                        | CoP    | CoO    | sattlite | CoP    | CoO    | sattlite |
|-----------------------------|--------|--------|----------|--------|--------|----------|
|                             | 2p 3/2 | 2p 3/2 | 2p 3/2   | 2p 1/2 | 2p 1/2 | 2p 1/2   |
| MoP/CoMoP <sub>2</sub> @NPC | 778.7  | 781.9  | 786.4    | 793.5  | 797.7  | 802.9    |
| CoMoP <sub>2</sub> @NPC     | 778.2  | 781.2  | 785.9    | 793.0  | 797.2  | 802.4    |

**Table S4** Surface atom contents of different elements determined by XPS data for MoP@NPC, MoP/CoMoP<sub>2</sub>@NPC and CoMoP<sub>2</sub>@NPC.

|                             | Co   | Mo   | P     | C     | O     | N     |
|-----------------------------|------|------|-------|-------|-------|-------|
| MoP@NPC                     | 0    | 5.51 | 8.38  | 39.46 | 29.91 | 16.74 |
| MoP/CoMoP <sub>2</sub> @NPC | 2.69 | 7.32 | 4.35  | 38.13 | 36.2  | 11.31 |
| CoMoP <sub>2</sub> @NPC     | 5.51 | 5.37 | 18.12 | 32.17 | 20.13 | 18.7  |

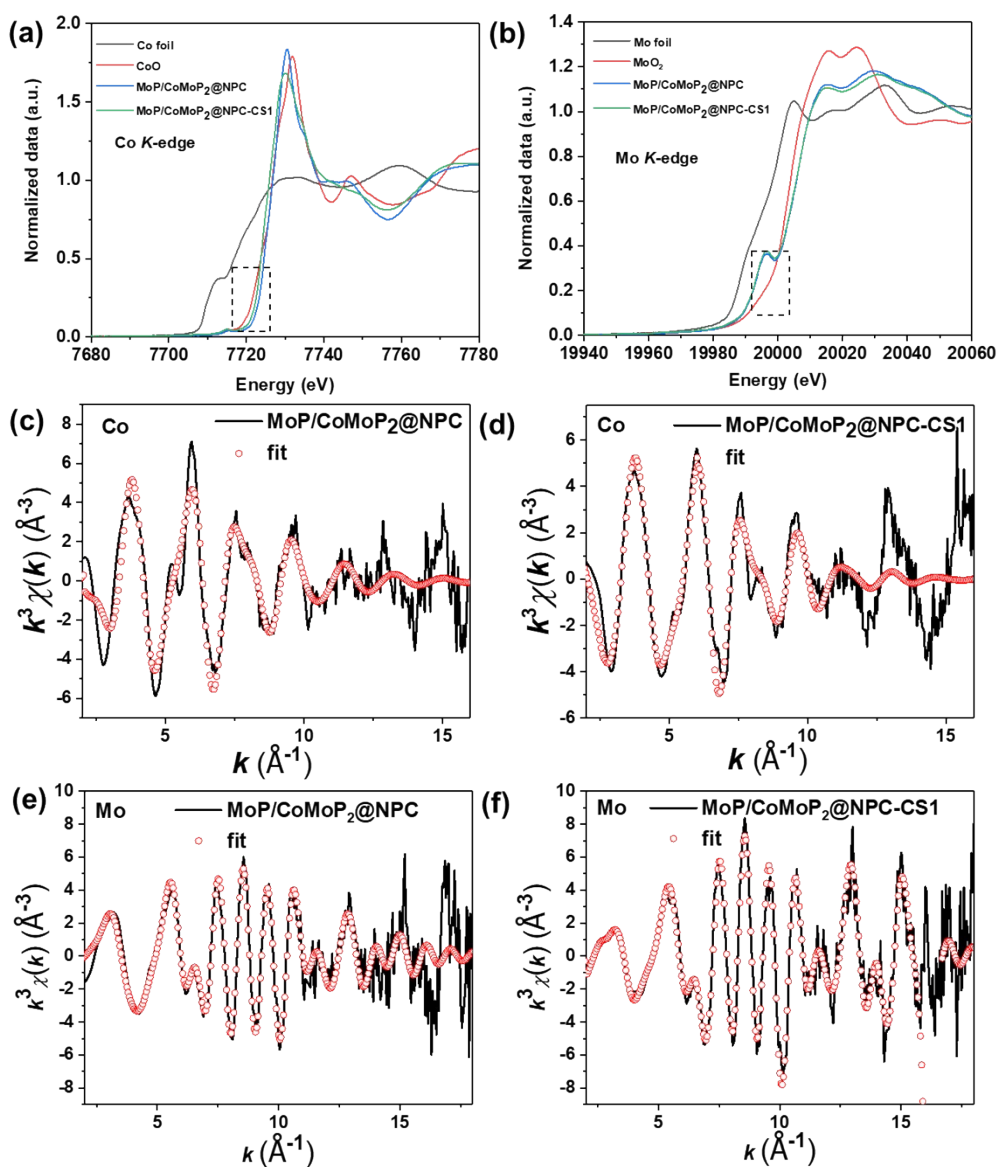

**Fig. S4** Co K-edge (a) and Mo K-edge (b) XANES spectra of Co foil, CoO, Mo foil, MoO<sub>2</sub>, MoP/CoMoP<sub>2</sub>@NPC and MoP/CoMoP<sub>2</sub>@NPC-CS1, respectively. Fourier transforms of the experimental Co K-edge (c, d) and Mo K-edge (e, f) EXAFS spectra of MoP/CoMoP<sub>2</sub>@NPC and MoP/CoMoP<sub>2</sub>@NPC-CS1, respectively.

**Table S5** EXAFS fitting parameters at the M *K*-edge for various samples.

| Sample                              | Shell | $CN^a$         | $R(\text{\AA})^b$ | $\sigma^2(\text{\AA}^2)^c$ | $\Delta E_0(\text{eV})^d$ | <i>R</i> factor |
|-------------------------------------|-------|----------------|-------------------|----------------------------|---------------------------|-----------------|
| Co <i>K</i> -edge ( $S_0^2=0.791$ ) |       |                |                   |                            |                           |                 |
| Co foil                             | Co-Co | 12*            | 2.494±0.001       | 0.0064±0.0001              | 8.0±0.3                   | 0.0019          |
| MoP/CoMoP <sub>2</sub> @NPC-CS1     | Co-O  | <b>3.9±0.2</b> | 2.088±0.013       | 0.0119±0.0030              | -7.3±1.8                  | 0.0089          |
|                                     | Co-P  | <b>2.2±0.4</b> | 2.236±0.016       |                            |                           |                 |
|                                     | Co-M  | 4.4±0.7        | 3.184±0.013       | 0.0207±0.0039              | 9.9±7.7                   |                 |
| MoP/CoMoP <sub>2</sub> @NPC         | Co-O  | <b>5.0±0.2</b> | 2.065±0.023       | 0.0111±0.0023              | -2.3±2.1                  | 0.0037          |
|                                     | Co-P  | <b>0.6±0.1</b> | 2.221±0.016       |                            |                           |                 |
|                                     | Co-M  | 2.6±0.3        | 3.048±0.025       | 0.0158±0.0052              | -1.0±3.3                  |                 |
| Mo <i>K</i> -edge ( $S_0^2=0.946$ ) |       |                |                   |                            |                           |                 |
| Mo foil                             | Mo-Mo | 8*             | 2.725±0.003       | 0.0039±0.0002              | -5.9±0.6                  | 0.0058          |
|                                     | Mo-Mo | 6*             | 3.141±0.004       | 0.0040±0.0003              |                           |                 |
| MoP/CoMoP <sub>2</sub> @NPC-CS1     | Mo-O  | <b>1.9±0.5</b> | 1.721±0.017       | 0.0054±0.0012              | -1.2±5.5                  | 0.0052          |
|                                     | Mo-P  | <b>1.6±0.3</b> | 2.157±0.020       |                            |                           |                 |
|                                     | Mo-M  | 6.7±0.6        | 3.228±0.021       | 0.0056±0.0017              | 4.8±5.0                   |                 |
|                                     | Mo-M  | 2.7±0.7        | 3.717±0.018       |                            | -0.4±0.2                  |                 |
| MoP/CoMoP <sub>2</sub> @NPC         | Mo-O  | <b>2.7±0.5</b> | 1.702±0.010       | 0.0032±0.0010              | -5.2±5.3                  | 0.0062          |
|                                     | Mo-P  | <b>1.2±0.3</b> | 2.112±0.018       |                            |                           |                 |
|                                     | Mo-M  | 4.8±0.8        | 3.234±0.008       | 0.0060±0.0008              | 8.7±1.8                   |                 |
|                                     | Mo-M  | 3.3±0.6        | 3.726±0.020       |                            | -0.2±4.2                  |                 |

<sup>a</sup>*CN*, coordination number; <sup>b</sup>*R*, the distance to the neighboring atom; <sup>c</sup> $\sigma^2$ , the Mean Square Relative Displacement (MSRD); <sup>d</sup> $\Delta E_0$ , inner potential correction; *R* factor indicates the goodness of the fit.  $S_0^2$  was fixed to 0.791 and 0.946, according to the experimental EXAFS fit of Co foil and Mo foil by fixing *CN* as the known crystallographic value. \* This value was fixed during EXAFS fitting, based on the known structure of Co and Mo. Fitting range:  $3.0 \leq k (\text{\AA}^{-1}) \leq 14.9$  and  $1.0 \leq R (\text{\AA}) \leq 3.0$  (Co foil);  $3.0 \leq k (\text{\AA}^{-1}) \leq 13.5$  and  $1.0 \leq R (\text{\AA}) \leq 2.4$  (Co2);  $3.0 \leq k (\text{\AA}^{-1}) \leq 11.9$  and  $1.0 \leq R (\text{\AA}) \leq 2.4$  (Co3);  $3.0 \leq k (\text{\AA}^{-1}) \leq 17.3$  and  $1.0 \leq R (\text{\AA}) \leq 3.5$  (Mo foil);  $3.0 \leq k (\text{\AA}^{-1}) \leq 15.8$  and  $1.0 \leq R (\text{\AA}) \leq 2.5$  (Mo2);  $3.0 \leq k (\text{\AA}^{-1}) \leq 15.6$  and  $1.0 \leq R (\text{\AA}) \leq 2.5$  (Mo3). A reasonable range of EXAFS fitting parameters:  $0.700 < S_0^2 < 1.000$ ;  $CN > 0$ ;  $\sigma^2 > 0 \text{\AA}^2$ ;  $|\Delta E_0| < 10 \text{ eV}$ ; *R* factor  $< 0.02$ .

**Table S6** Comparison of HER performance of MoP/CoMoP<sub>2</sub>@NPC catalysts with other MoP-based electrocatalysts in 0.5 M H<sub>2</sub>SO<sub>4</sub>.

| Electrocatalyst                     | $\eta_{10}$<br>(mV<br>vs.RHE) | Tafel<br>slope<br>(mV dec <sup>-1</sup> ) | Reference               |
|-------------------------------------|-------------------------------|-------------------------------------------|-------------------------|
| <b>MoP/CoMoP<sub>2</sub>@NPC</b>    | <b>71</b>                     | <b>37</b>                                 | <b><i>This work</i></b> |
| MoP@NC                              | 96                            | 49                                        | [1]                     |
| MoP@NPCNFs                          | 64                            | 66                                        | [2]                     |
| MoP NA/CC                           | 124                           | 58                                        | [3]                     |
| N-MoP/C                             | 150                           | 62                                        | [4]                     |
| MoP@C@rGo                           | 169                           | 79                                        | [5]                     |
| La-MoP@NC                           | 142                           | 58                                        | [6]                     |
| MoP@NPCS                            | 113                           | 58                                        | [7]                     |
| MoP@NPC-H                           | 141                           | 59                                        | [8]                     |
| MoS <sub>2</sub> /MoP/NC            | 151                           | 58                                        | [9]                     |
| MoPS                                | 158                           | 52                                        | [10]                    |
| CoP(MoP)-<br>CoMoO <sub>3</sub> @CN | 198                           | 105                                       | [11]                    |
| Mo <sub>2</sub> C/MoP@NPC           | 160                           | 75                                        | [12]                    |

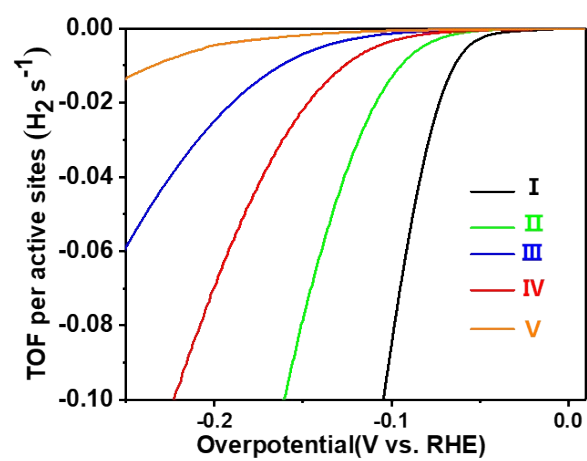

**Fig. S5** TOF values for HER in 0.5 M  $\text{H}_2\text{SO}_4$ : I:  $\text{MoP}/\text{CoMoP}_2@\text{NPC}$ , II:  $\text{MoP}@\text{NPC}$ , III:  $\text{CoMoP}_2@\text{NPC}$ , IV:  $\text{MoP}/\text{CoMoP}_2@\text{NPC} @\text{NPC-CS1}$ , V:  $\text{MoP}/\text{CoMoP}_2@\text{NPC} @\text{NPC-CS2}$ .

**Table S7** Summarized acidic HER activity of prepared catalysts

| <b>Electrocatalyst</b>              | <b><math>\eta_{10}</math><br/>(mV<br/>vs.<br/>RHE)</b> | <b><math>\eta_{100}</math><br/>(mV<br/>vs.<br/>RHE)</b> | <b>Tafel<br/>slope<br/>(mV dec<sup>-1</sup>)</b> | <b>TOF<br/>(100<br/>mV, H<sub>2</sub><br/>s<sup>-1</sup>)</b> | <b>TOF<br/>(200<br/>mV,<br/>H<sub>2</sub> s<sup>-1</sup>)</b> | <b>ECSA<br/>(cm<sup>2</sup>)</b> | <b>EIS<br/>(<math>\Omega</math>)</b> |
|-------------------------------------|--------------------------------------------------------|---------------------------------------------------------|--------------------------------------------------|---------------------------------------------------------------|---------------------------------------------------------------|----------------------------------|--------------------------------------|
| MoP@NPC                             | 109                                                    | 200                                                     | 61                                               | 0.01                                                          | 0.19                                                          | 22.2                             | 32.7                                 |
| CoMoP <sub>2</sub> @NPC             | 184                                                    | 350                                                     | 96                                               | 0.001                                                         | 0.02                                                          | 5.4                              | 76.2                                 |
| MoP/CoMoP <sub>2</sub> @NPC         | 71                                                     | 123                                                     | 37                                               | 0.09                                                          | 0.60                                                          | 35.9                             | 13.5                                 |
| MoP/CoMoP <sub>2</sub> @NPC-<br>CS1 | 144                                                    | 270                                                     | 84                                               | 0.003                                                         | 0.07                                                          | 12.9                             | 53.2                                 |
| MoP/CoMoP <sub>2</sub> @NPC-<br>CS2 | 245                                                    | 413                                                     | 120                                              | 0.0006                                                        | 0.005                                                         | 1.7                              | 161.9                                |
| Pt/C                                | 34                                                     | 149                                                     | 38                                               |                                                               |                                                               |                                  |                                      |



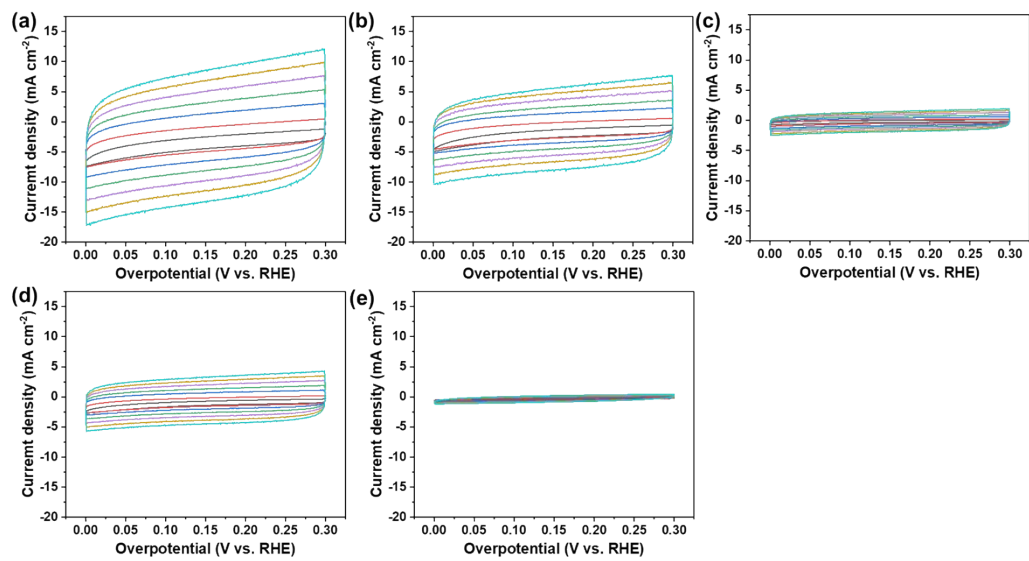

**Fig. S6** CV curves with different scan rates in 0.5 M  $\text{H}_2\text{SO}_4$  for (a) MoP/CoMoP<sub>2</sub>@NPC, (b) MoP@NPC, (b) CoMoP<sub>2</sub>@NPC, (d) MoP/CoMoP<sub>2</sub>@NPC-CS1 and (e) MoP/CoMoP<sub>2</sub>@NPC-CS2.

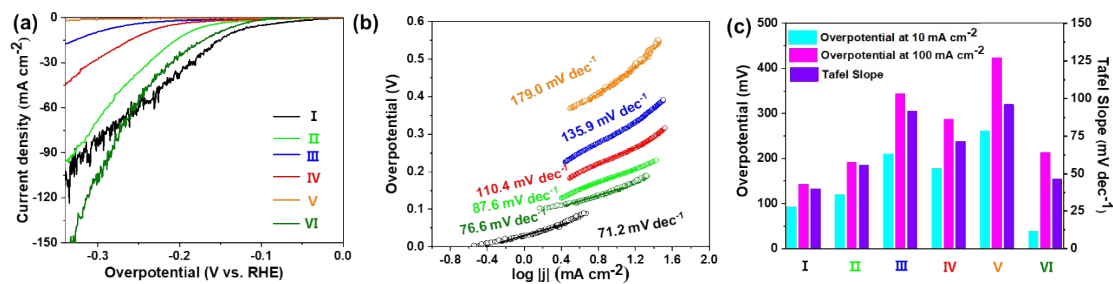

**Fig. S7** (a) Polarization curves (iR corrected) for HER in 1 M PBS; (b) their corresponding Tafel plots; (c) Comparisons of  $\eta_{10}$  and Tafel slope of the corresponding samples, I: MoP/CoMoP<sub>2</sub>@NPC, II: MoP@NPC, III: CoMoP<sub>2</sub>@NPC, IV: MoP/CoMoP<sub>2</sub>@NPC @NPC-CS1, V: MoP/CoMoP<sub>2</sub>@NPC @NPC-CS2, VI: commercial Pt/C.

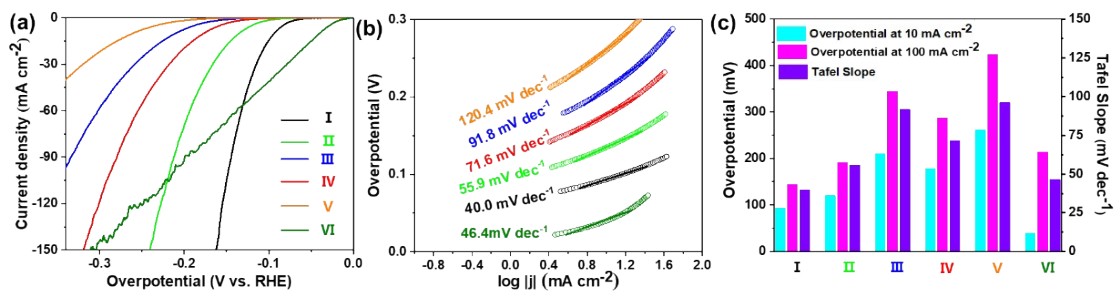

**Fig. S8** (a) Polarization curves ( $iR$  corrected) for HER in 1 M KOH; (b) their corresponding Tafel plots; (c) Comparisons of  $\eta_{10}$  and Tafel slope of the corresponding samples: I: MoP/CoMoP<sub>2</sub>@NPC, II: MoP@NPC, III: CoMoP<sub>2</sub>@NPC, IV: MoP/CoMoP<sub>2</sub>@NPC @NPC-CS1, V: MoP/CoMoP<sub>2</sub>@NPC @NPC-CS2, VI: commercial Pt/C.

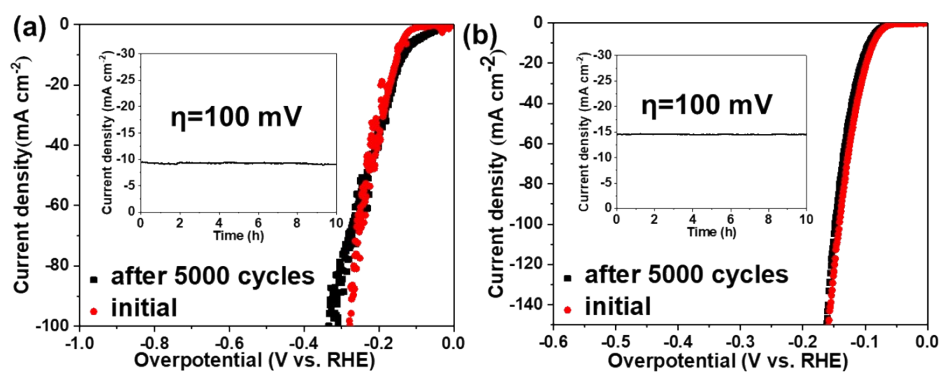

**Fig. S9** Stability of the MoP/CoMoP<sub>2</sub>@NPC with an initial LSV curve and after 5000 cycles in 1 M PBS (a) and 1M KOH (b), inset: the long-term durability tests (CA curve) at  $\eta=100$  mV.

**Table S8** Comparison of HER performance of MoP/CoMoP<sub>2</sub>@NPC catalysts with other MoP-based electrocatalysts in 1 M PBS and 1 M KOH.

| Catalysts                        | $\eta_{10}$ (mV)<br>(1 M PBS) | Tafel Slope<br>(mV dec <sup>-1</sup> )<br>(1 M PBS) | $\eta_{10}$ (mV)<br>(1 M KOH) | Tafel Slope<br>(mV dec <sup>-1</sup> )<br>(1 M KOH) | Ref.             |
|----------------------------------|-------------------------------|-----------------------------------------------------|-------------------------------|-----------------------------------------------------|------------------|
| <b>MoP/CoMoP<sub>2</sub>@NPC</b> | <b>131</b>                    | <b>71</b>                                           | <b>93</b>                     | <b>40</b>                                           | <b>This work</b> |
| MoP NA/CC                        | 187                           | 94                                                  | 80                            | 83                                                  | [3]              |
| MoP@NC                           | 191                           | 95                                                  | 149                           | 62                                                  | [1]              |
| MoP/NPG                          | 150                           | 102                                                 | 126                           | 56                                                  | [13]             |
| P-MoP/Mo <sub>2</sub> N          | 91                            | 51                                                  | 89                            | 78                                                  | [14]             |
| Mo <sub>2</sub> C/MoP@NPC        | 228                           | 125                                                 | 169                           | 65                                                  | [12]             |
| MoP/Mo <sub>2</sub> C@C          | 136                           | 93                                                  | 75                            | 58                                                  | [15]             |
| 3.4 at% S-MoP                    | 148                           | 142                                                 | 106                           | 56                                                  | [16]             |
| HF-MoSP                          | /                             | 456                                                 | 128                           | 89                                                  | [17]             |
| 0.02 Ni-MoP                      | 222                           | 160                                                 | 103                           | 162                                                 | [18]             |

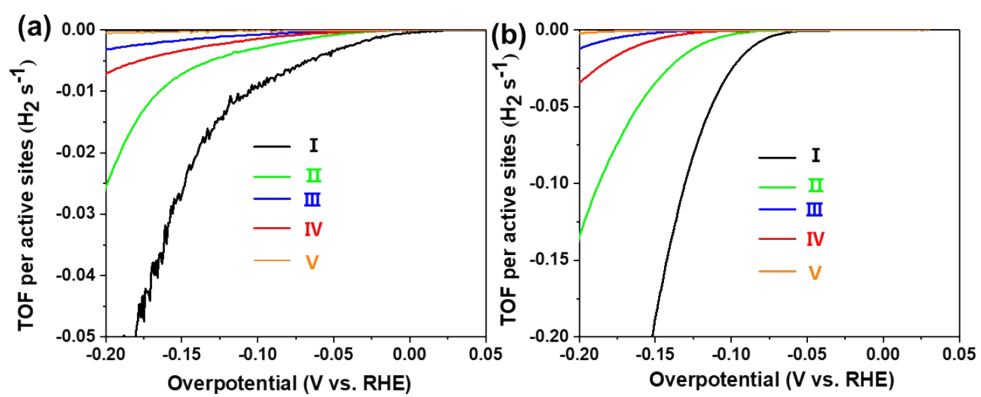

**Fig. S10** TOF values of in neutral (a) and alkaline (b) media: I: MoP/CoMoP<sub>2</sub>@NPC, II: MoP@NPC, III: CoMoP<sub>2</sub>@NPC, IV: MoP/CoMoP<sub>2</sub>@NPC @NPC-CS1, V: MoP/CoMoP<sub>2</sub>@NPC @NPC-CS2.

**Table S9** Summarized acidic OER performance of some previously reported electrocatalysis with present work in acidic media.

| Catalysts                                                                            | $\eta_{10}$ (mV)<br>(0.5 M H <sub>2</sub> SO <sub>4</sub> ) | Tafel Slope (mV<br>dec <sup>-1</sup> )<br>(0.5 M H <sub>2</sub> SO <sub>4</sub> ) | Ref.             |
|--------------------------------------------------------------------------------------|-------------------------------------------------------------|-----------------------------------------------------------------------------------|------------------|
| <b>MoP/CoMoP<sub>2</sub>@NPC</b>                                                     | <b>261</b>                                                  | <b>37</b>                                                                         | <b>This work</b> |
| F doped Cu <sub>1.5</sub> Mn <sub>1.5</sub> O <sub>4</sub>                           | 320                                                         | 60                                                                                | [19]             |
| Co <sub>3</sub> O <sub>4</sub> /FTO                                                  | 570                                                         | 80                                                                                | [20]             |
| Ag-doped Co <sub>3</sub> O <sub>4</sub>                                              | 470                                                         | 92                                                                                | [21]             |
| Co <sub>2</sub> TiO <sub>4</sub>                                                     | 513                                                         | 240                                                                               | [22]             |
| Co <sub>3</sub> O <sub>4</sub> @C/CP                                                 | 370                                                         | 82                                                                                | [23]             |
| Co <sub>0.05</sub> Fe <sub>0.95</sub> O <sub>y</sub>                                 | 650                                                         | 110                                                                               | [24]             |
| Fe-TiO <sub>x</sub> LNWs/Ti                                                          | 260                                                         | 126                                                                               | [25]             |
| FeNC                                                                                 | 320                                                         | 305                                                                               | [26]             |
| MoS <sub>2</sub> /Co <sub>9</sub> S <sub>8</sub> /Ni <sub>3</sub> S <sub>2</sub> /Ni | 225                                                         | 78                                                                                | [27]             |
| SWCNTs/MoSe <sub>2</sub> -2:Mo <sub>2</sub> C                                        | 197                                                         | /                                                                                 | [28]             |

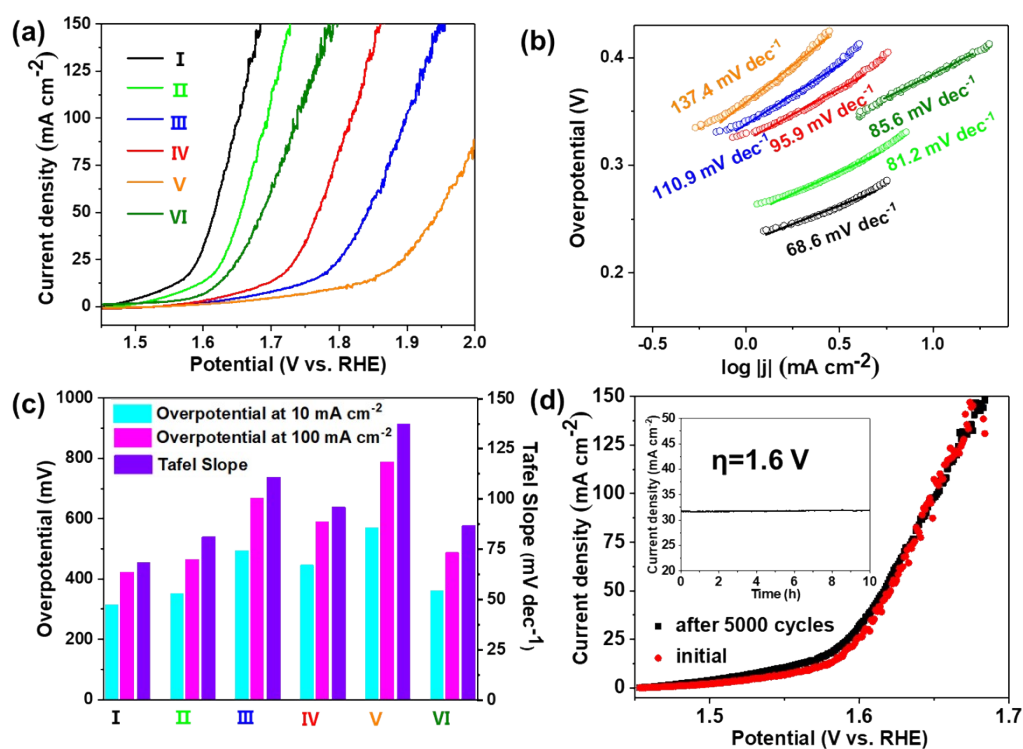

**Fig. S11** (a) Polarization curves (iR corrected) for OER in 1 M PBS; (b) their corresponding Tafel plots; (c) Comparisons of  $\eta_{10}$  and Tafel slope of the corresponding samples. (d) Stability of the MoP/CoMoP<sub>2</sub>@NPC with an initial LSV curve and after 5000 cycles in 0.5 M H<sub>2</sub>SO<sub>4</sub>, inset: the long-term durability tests (CA curve) at  $\eta = 1.6 \text{ V}$ . I: MoP/CoMoP<sub>2</sub>@NPC, II: MoP@NPC, III: CoMoP<sub>2</sub>@NPC, IV: MoP/CoMoP<sub>2</sub>@NPC @NPC-CS1, V: MoP/CoMoP<sub>2</sub>@NPC @NPC-CS2, VI: commercial Pt/C.



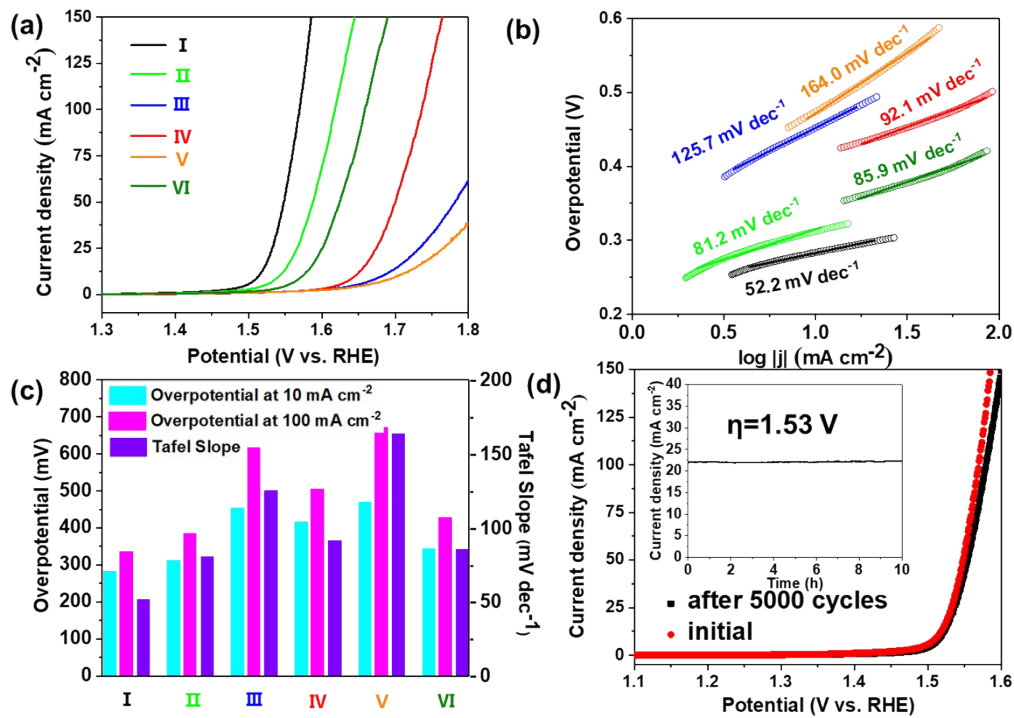

**Fig. S12** (a) Polarization curves (iR corrected) for OER in 1 M KOH; (b) their corresponding Tafel plots; (c) Comparisons of  $\eta_{10}$  and Tafel slope of the corresponding samples. (d) Stability of the MoP/CoMoP<sub>2</sub>@NPC with an initial LSV curve and after 5000 cycles in 0.5 M H<sub>2</sub>SO<sub>4</sub>, inset: the long-term durability tests (CA curve) at  $\eta = 1.6 \text{ V}$ . I: MoP/CoMoP<sub>2</sub>@NPC, II: MoP@NPC, III: CoMoP<sub>2</sub>@NPC, IV: MoP/CoMoP<sub>2</sub>@NPC @NPC-CS1, V: MoP/CoMoP<sub>2</sub>@NPC @NPC-CS2, VI: commercial Pt/C.

**Table S10** OER parameters in 0.5M H<sub>2</sub>SO<sub>4</sub> for MoP@NPC, MoP/CoMoP<sub>2</sub>@NPC, CoMoP<sub>2</sub>@NPC, MoP/CoMoP<sub>2</sub>@NPC-CS1 and MoP/CoMoP<sub>2</sub>@NPC-CS2.

|                                 | $\eta_{10}$ (mV) | $\eta_{100}$ (mV) | Tafel Slope (mV dec <sup>-1</sup> ) |
|---------------------------------|------------------|-------------------|-------------------------------------|
| MoP@NPC                         | 283              | 373               | 61                                  |
| MoP/CoMoP <sub>2</sub> @NPC     | 260              | 323               | 37                                  |
| CoMoP <sub>2</sub> @NPC         | 430              | 560               | 96                                  |
| MoP/CoMoP <sub>2</sub> @NPC-CS1 | 367              | 479               | 84                                  |
| MoP/CoMoP <sub>2</sub> @NPC-CS2 | 456              | 593               | 120                                 |
| RuO <sub>2</sub>                | 298              | 430               | 38                                  |

**Table S11** OER parameters in 1M PBS for MoP@NPC, MoP/CoMoP<sub>2</sub>@NPC, CoMoP<sub>2</sub>@NPC, MoP/CoMoP<sub>2</sub>@NPC-CS1 and MoP/CoMoP<sub>2</sub>@NPC-CS2.

|                                 | $\eta_{10}$ (mV) | $\eta_{100}$ (mV) | Tafel Slope (mV dec <sup>-1</sup> ) |
|---------------------------------|------------------|-------------------|-------------------------------------|
| MoP@NPC                         | 352              | 466               | 81                                  |
| MoP/CoMoP <sub>2</sub> @NPC     | 317              | 423               | 69                                  |
| CoMoP <sub>2</sub> @NPC         | 495              | 669               | 111                                 |
| MoP/CoMoP <sub>2</sub> @NPC-CS1 | 447              | 589               | 96                                  |
| MoP/CoMoP <sub>2</sub> @NPC-CS2 | 570              | 791               | 137                                 |
| RuO <sub>2</sub>                | 385              | 509               | 87                                  |

**Table S12** OER parameters in 1 M KOH for MoP@NPC, MoP/CoMoP<sub>2</sub>@NPC, CoMoP<sub>2</sub>@NPC, MoP/CoMoP<sub>2</sub>@NPC-CS1 and MoP/CoMoP<sub>2</sub>@NPC-CS2.

|                                 | $\eta_{10}$ (mV) | $\eta_{100}$ (mV) | Tafel Slope (mV dec <sup>-1</sup> ) |
|---------------------------------|------------------|-------------------|-------------------------------------|
| MoP@NPC                         | 313              | 388               | 81                                  |
| MoP/CoMoP <sub>2</sub> @NPC     | 284              | 340               | 52                                  |
| CoMoP <sub>2</sub> @NPC         | 453              | 620               | 126                                 |
| MoP/CoMoP <sub>2</sub> @NPC-CS1 | 415              | 507               | 92                                  |
| MoP/CoMoP <sub>2</sub> @NPC-CS2 | 474              | 674               | 164                                 |
| RuO <sub>2</sub>                | 344              | 429               | 86                                  |

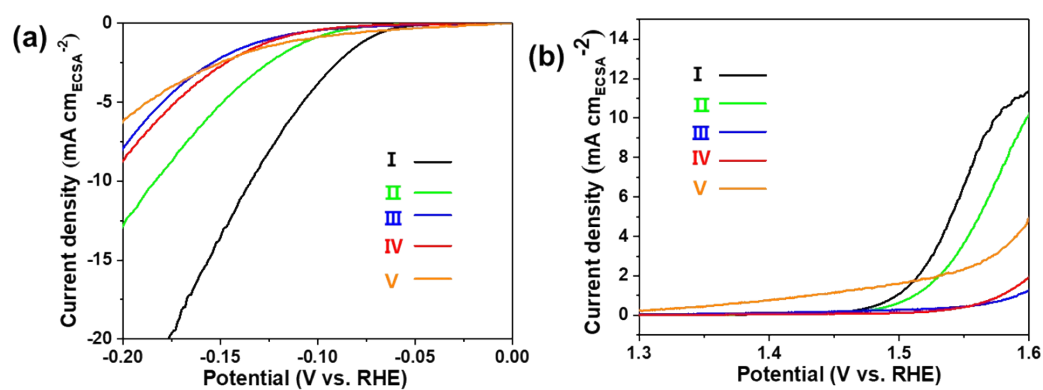

**Fig. S13** LSV curves normalized by ECSA for HER and OER in 0.5 M H<sub>2</sub>SO<sub>4</sub> of I: MoP/CoMoP<sub>2</sub>@NPC, II: MoP@NPC, III: CoMoP<sub>2</sub>@NPC, IV: MoP/CoMoP<sub>2</sub>@NPC-CS1, V: MoP/CoMoP<sub>2</sub>@NPC-CS2.

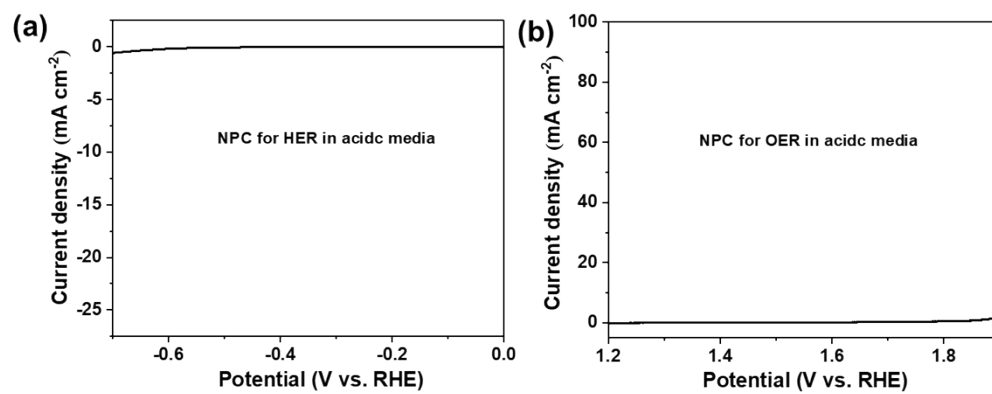

**Fig. S14** LSV curves of NPC for HER and OER in acidic media.

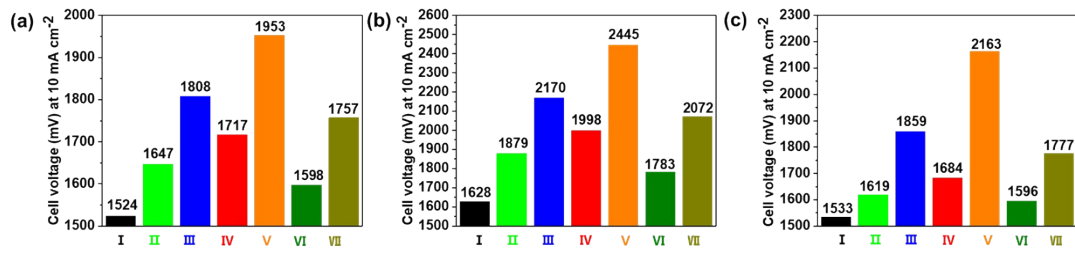

**Fig. S15** Comparisons of  $\eta_{10}$  of cell voltage in acidic (a), neutral (b) and alkaline media(c). I: MoP/CoMoP<sub>2</sub>@NPC||MoP/CoMoP<sub>2</sub>@NPC, II: MoP@NPC||MoP@NPC, III: CoMoP<sub>2</sub>@NPC||CoMoP<sub>2</sub>@NPC, IV: MoP/CoMoP<sub>2</sub>@NPC-CS1||MoP/CoMoP<sub>2</sub>@NPC-CS1, V: MoP/CoMoP<sub>2</sub>@NPC-CS2||MoP/CoMoP<sub>2</sub>@NPC-CS2, VI: CoMoP<sub>2</sub>@NPC||MoP@NPC, CoMoP<sub>2</sub>@NPC||CoMoP<sub>2</sub>@NP, VII: RuO<sub>2</sub>||Pt/C.

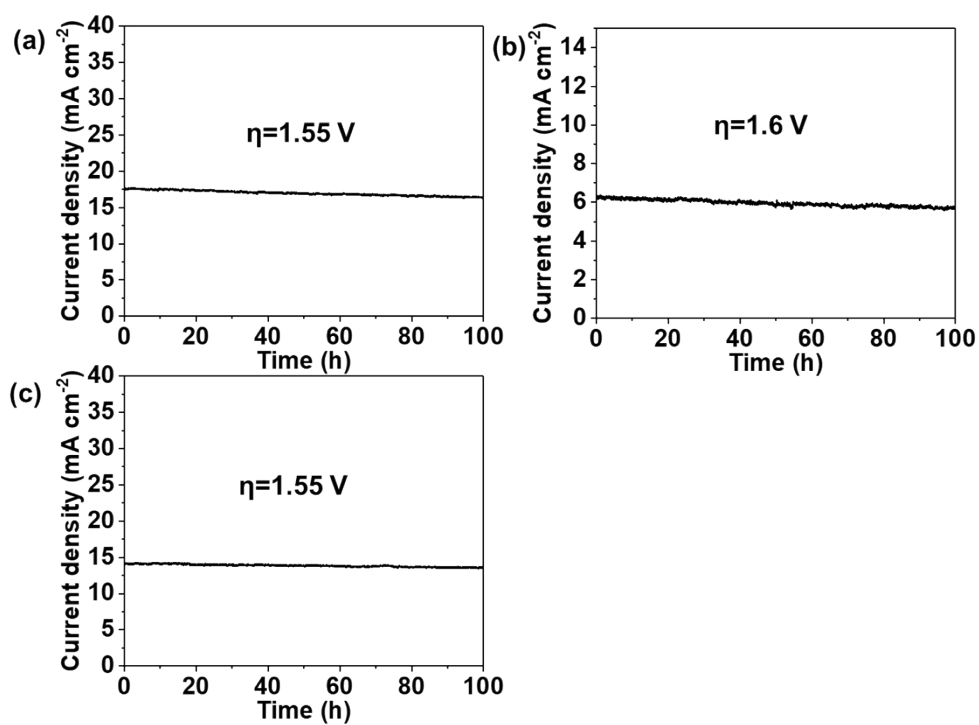

**Fig. S16** The long-term durability tests (CA curve) at cell voltage=1.55, 1.6 and 1.55 V in 0.5M H<sub>2</sub>SO<sub>4</sub> (a), 1M PBS (b) and 1M KOH (c).



**Table S13** Co/Mo/P/C compositions before and after stability test by ICP (Co/Mo) and organic element analysis (P/C).

|    | Before stability test (%) | After stability test (%) |
|----|---------------------------|--------------------------|
| Co | 7.2                       | 6.7                      |
| Mo | 28.7                      | 25.3                     |
| P  | 12.8                      | 13.2                     |
| C  | 18.5                      | 18.9                     |

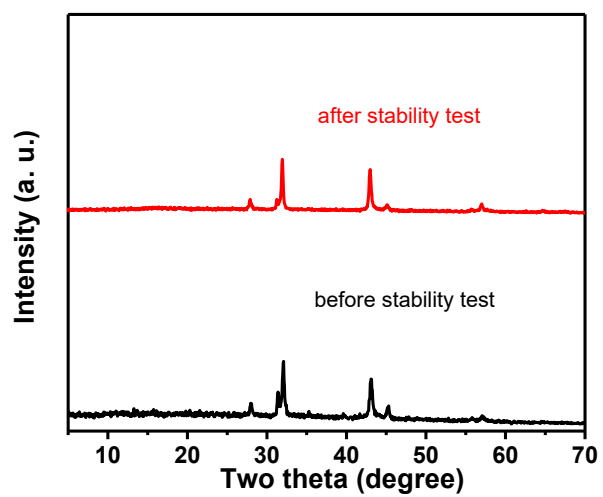

**Fig. S17** The XRD patterns of MoP/CoMoP<sub>2</sub>@NPC before and after stability test.

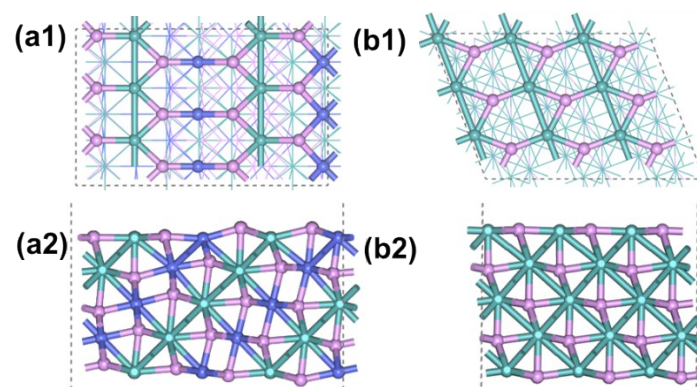

**Fig. S18** Top (the first row, 1) and side (the second row, 2) views of (a) CoMoP<sub>2</sub>(104) and (b) MoP(101) surface. The Mo, Co, P atoms are respectively displayed in cyan, blue and pink.

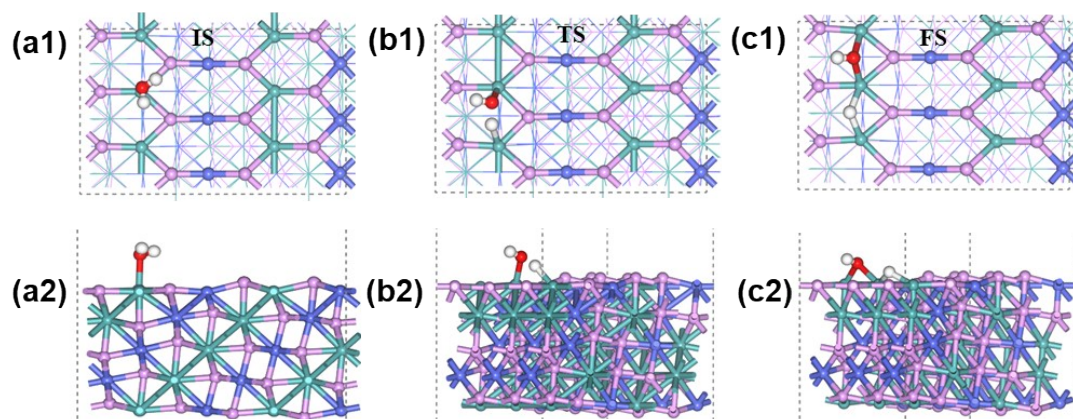

**Fig. S19** Top (the first row, 1) and side (the second row, 2) views of DFT optimized IS (a), TS (b) and FS (c) structures for H<sub>2</sub>O dissociation on CoMoP<sub>2</sub> (104). The H, O atoms are respectively displayed in white and red.

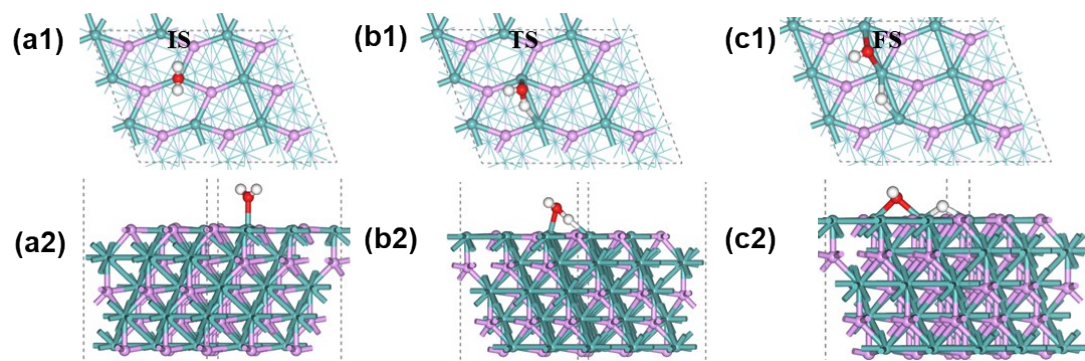

**Fig. S20** Top (the first row, 1) and side (the second row, 2) views of DFT optimized IS (a), TS (b) and FS (c) structures for H<sub>2</sub>O dissociation on MoP (101).

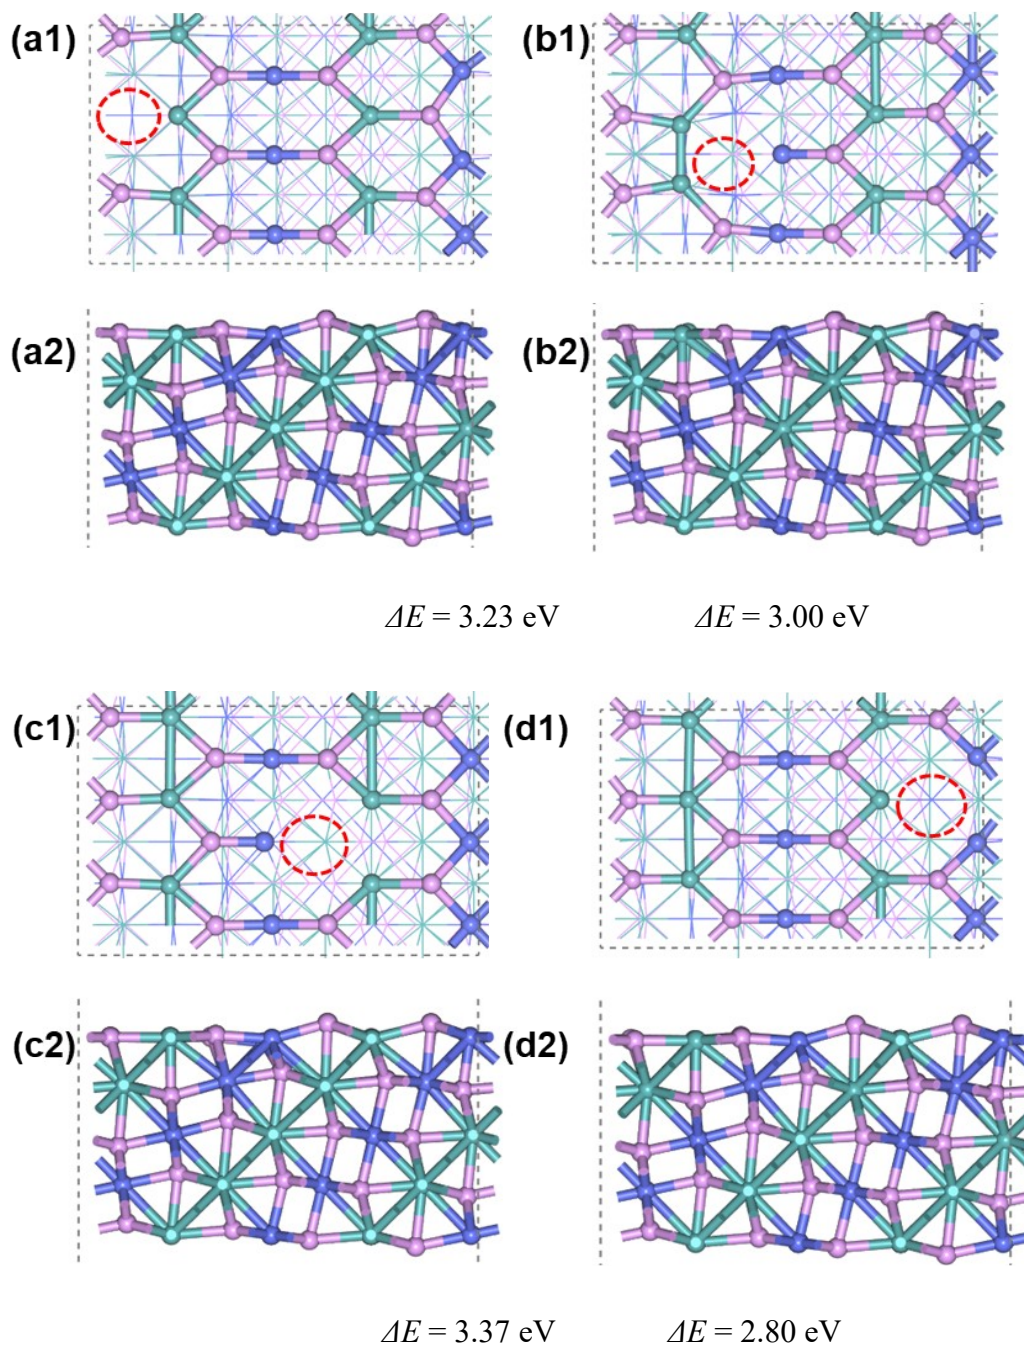

**Fig. S21** Top (the first row, 1) and side (the second row, 2) views of possible P vacancy on  $\text{CoMoP}_2(104)$  after geometry optimization (the red dashed circle marks the site of P vacancy) and the reaction energies with reference to the chemical potential of P at gaseous  $\text{PH}_3$ . The structure shown in [Figure S21d2](#) has the lowest P vacancy formation energy.

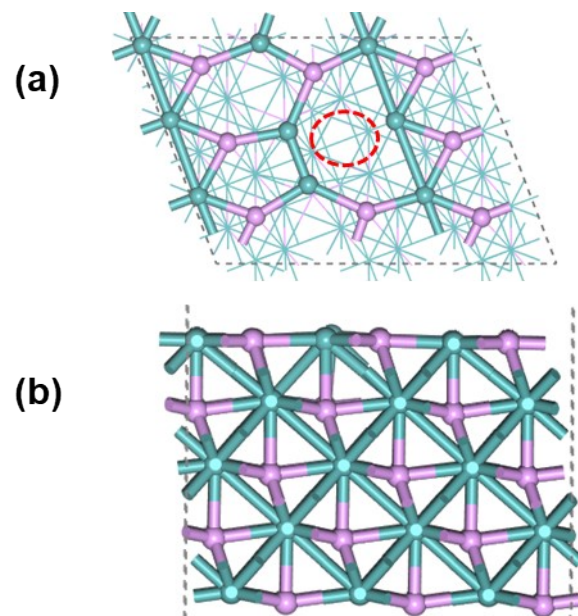

**Fig. S22** Top (the first row, a) and side (the second row, b) views of P vacancy on MoP(101) after geometry optimization (the red dashed circle marks the site of P vacancy).

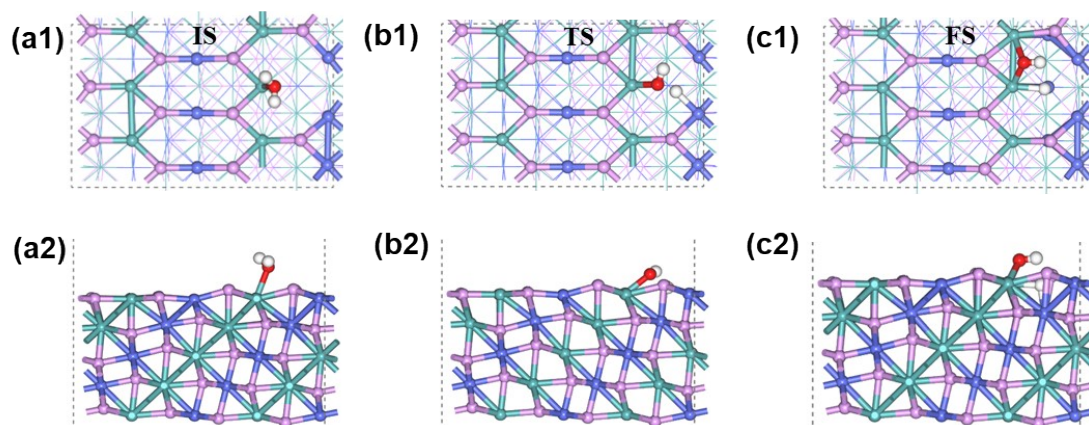

**Fig. S23** Top (the first row) and side (the second row) views of DFT optimized IS, TS and FS structures for H<sub>2</sub>O dissociation on CoMoP<sub>2</sub>-Pv.



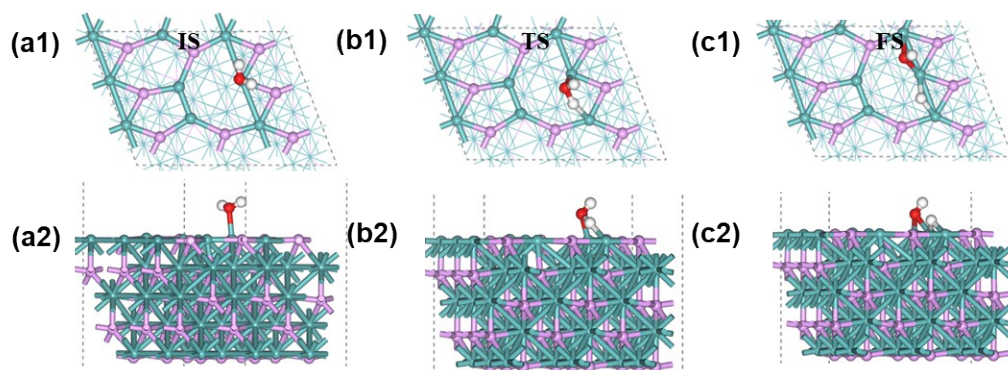

**Fig. S24** Top (the first row, 1) and side (the second row, 2) views of DFT optimized IS (a), TS (b) and FS (c) structures for H<sub>2</sub>O dissociation on MoP-Pv.

## References

1. C. Pi, C. Huang, Y. Yang, H. Song, X. Zhang, Y. Zheng, B. Gao, J. Fu, P. K. Chu and K. Huo, *Applied Catalysis B: Environmental*, 2020, **263**, 118358.
2. M. Wang, C. Ye, M. Xu and S. Bao, *Nano Research*, 2018, **11**, 4728-4734.
3. Z. Pu, S. Wei, Z. Chen and S. Mu, *Applied Catalysis B: Environmental*, 2016, **196**, 193-198.
4. X. Liu, L. Zhang, M. Li and X. Hu, *Chem. Commun. (Cambridge, U. K.)*, 2018, **54**, 2502-2505.
5. Y. Zhang, J. Yang, Q. Dong, H. Geng, Y. Zheng, Y. Liu, W. Wang, C. C. Li and X. Dong, *ACS Appl. Mater. Interfaces*, 2018, **10**, 26258-26263.
6. P. Wei, X. Li, Z. He, Z. Li, X. Zhang, X. Sun, Q. Li, H. Yang, J. Han and Y. Huang, *Applied Catalysis B: Environmental*, 2021, **299**, 120657.
7. J.-T. Ren, L. Chen, D.-D. Yang and Z.-Y. Yuan, *Applied Catalysis B: Environmental*, 2020, **263**, 118352.
8. J.-Q. Chi, W.-K. Gao, L.-M. Zhang, B. Dong, K.-L. Yan, J.-H. Lin, B. Liu, Y.-M. Chai and C.-G. Liu, *ACS Sustainable Chemistry & Engineering*, 2018, **6**, 7676-7686.
9. J.-Q. Chi, Y.-M. Chai, X. Shang, B. Dong, C.-G. Liu, W. Zhang and Z. Jin, *Journal of Materials Chemistry A*, 2018, **6**, 24783-24792.
10. Y. Huang, X. Song, J. Deng, C. Zha, W. Huang, Y. Wu and Y. Li, *Applied Catalysis B: Environmental*, 2019, **245**, 656-661.
11. L. Yu, Y. Xiao, C. Luan, J. Yang, H. Qiao, Y. Wang, X. Zhang, X. Dai, Y. Yang and H. Zhao, *ACS Appl. Mater. Interfaces*, 2019, **11**, 6890-6899.
12. J.-Q. Chi, W.-K. Gao, J.-H. Lin, B. Dong, K.-L. Yan, J.-F. Qin, Z.-Z. Liu, Y.-M. Chai

- and C.-G. Liu, *Journal of colloid and interface science*, 2018, **513**, 151-160.
13. R. Ge, J. Huo, T. Liao, Y. Liu, M. Zhu, Y. Li, J. Zhang and W. Li, *Applied Catalysis B: Environmental*, 2020, **260**, 118196.
  14. Y. Gu, A. Wu, Y. Jiao, H. Zheng, X. Wang, Y. Xie, L. Wang, C. Tian and H. Fu, *Angew. Chem. Int. Ed.*, 2021, **60**, 6673-6681.
  15. L.-N. Zhang, S.-H. Li, H.-Q. Tan, S. U. Khan, Y.-Y. Ma, H.-Y. Zang, Y.-H. Wang and Y.-G. Li, *ACS Appl. Mater. Interfaces*, 2017, **9**, 16270-16279.
  16. K. Liang, S. Pakhira, Z. Yang, A. Nijamudheen, L. Ju, M. Wang, C. I. Aguirre-Velez, G. E. Sterbinsky, Y. Du and Z. Feng, *ACS Catalysis*, 2018, **9**, 651-659.
  17. A. Wu, C. Tian, H. Yan, Y. Jiao, Q. Yan, G. Yang and H. Fu, *Nanoscale*, 2016, **8**, 11052-11059.
  18. M. Ding, H. Xu, M. Liu, Y. Wang, A. Wang, T. Lin, L. Zhang and K. Zhang, *Chem. Eng. J.*, 2022, **430**, 132674.
  19. P. P. Patel, M. K. Datta, O. I. Velikokhatnyi, R. Kuruba, K. Damodaran, P. Jampani, B. Gattu, P. M. Shanthi, S. S. Damle and P. N. Kumta, *Scientific reports*, 2016, **6**, 28367.
  20. J. S. Mondschein, J. F. Callejas, C. G. Read, J. Y. Chen, C. F. Holder, C. K. Badding and R. E. Schaak, *Chem. Mater.*, 2017, **29**, 950-957.
  21. K.-L. Yan, J.-F. Qin, J.-H. Lin, B. Dong, J.-Q. Chi, Z.-Z. Liu, F.-N. Dai, Y.-M. Chai and C.-G. Liu, *Journal of Materials Chemistry A*, 2018, **6**, 5678-5686.
  22. S. Anantharaj, K. Karthick and S. Kundu, *Inorg. Chem.*, 2019, **58**, 8570-8576.
  23. J. Wang, J. Liu, B. Zhang, H. Wan, Z. Li, X. Ji, K. Xu, C. Chen, D. Zha and L. Miao,

- Nano Energy*, 2017, **42**, 98-105.
24. W. L. Kwong, C. C. Lee, A. Shchukarev and J. Messinger, *Chem. Commun. (Cambridge, U. K.)*, 2019, **55**, 5017-5020.
  25. L. Zhao, Q. Cao, A. Wang, J. Duan, W. Zhou, Y. Sang and H. Liu, *Nano Energy*, 2018, **45**, 118-126.
  26. K. Mamtani, D. Jain, A. C. Co and U. S. Ozkan, *Energy Fuels*, 2017, **31**, 6541-6547.
  27. Y. Yang, H. Yao, Z. Yu, S. M. Islam, H. He, M. Yuan, Y. Yue, K. Xu, W. Hao and G. Sun, *Journal of the American Chemical Society*, 2019, **141**, 10417-10430.
  28. L. Najafi, S. Bellani, R. Oropesa-Nuñez, M. Prato, B. Martín-García, R. Brescia and F. Bonaccorso, *ACS Nano*, 2019, **13**, 3162-3176.
